# Supplementary material for: Radiosensitization of Clioquinol Combined with Zinc in the Nasopharyngeal Cancer Stem-like Cells by Inhibiting Autophagy in Vitro and in Vivo
Source: PubMed Central journal article supplement (PMC7019136; doi:10.7150/ijbs.40305), 2020-01-14
Supplement: ijbsv16p0777s1.pdf [file ijbsv16p0777s1.pdf]

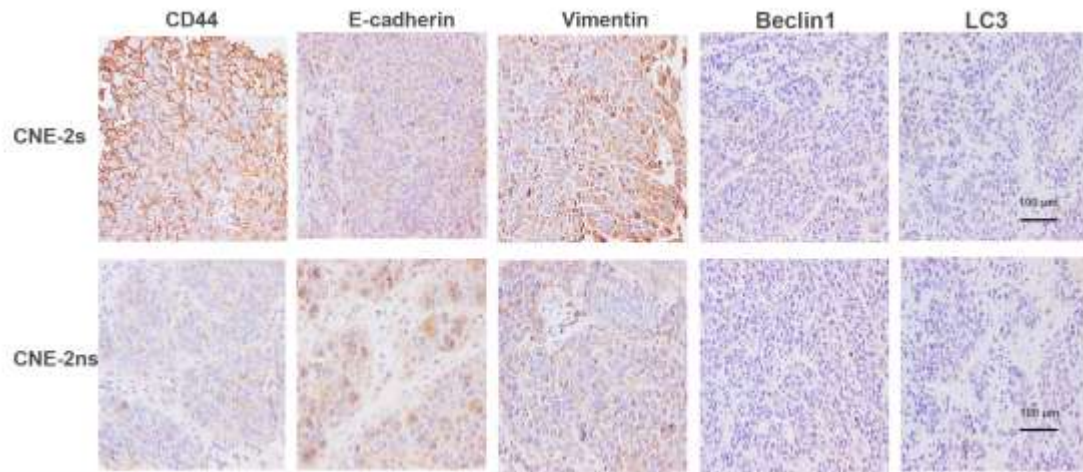

**Fig.S1:** The expression of CD44, Vimentin, E-cadherin, Beclin1 and LC3 in CNE-2s and CNE-2ns tumor tissues.
